# Supplementary material for: Long-Term Outcomes of Breast Cancer Patients Who Underwent Selective Neck Dissection for Metachronous Isolated Supraclavicular Nodal Metastasis
Source: MDPI journal article supplement (doi:10.3390/cancers14010164), 2021-12-29
Supplement: s1 [file s1]

**Table S1. Univariate and Multivariate Analysis of Post-recurrence Survival after Metachronous Isolated Supraclavicular Lymph Node Metastasis**

| Variables                              |          | No. | Median<br>Survival<br>Time<br>(Months) | 95% CI *<br>of<br>Median | <i>p</i> Δ<br>Value | HR | 95% CI<br>of HR | <i>p</i><br>Value |
|----------------------------------------|----------|-----|----------------------------------------|--------------------------|---------------------|----|-----------------|-------------------|
| <i>Initial clinical features</i>       |          |     |                                        |                          |                     |    |                 |                   |
| Age (years)                            | ≤40      | 42  | 45.3                                   | 24.3–<br>66.3            | 0.673               | –  |                 |                   |
|                                        | >40      | 97  | 44.2                                   | 34.2–<br>54.1            |                     |    |                 |                   |
| Tumor size (cm)                        | ≤3       | 92  | 46.9                                   | 38.6–<br>55.2            | 0.397               | –  |                 |                   |
|                                        | >3       | 47  | 38.6                                   | 15.0–<br>62.3            |                     |    |                 |                   |
| Axillary involvement                   | Yes      | 105 | 41.6                                   | 30.9–<br>52.2            | 0.118               | –  |                 |                   |
|                                        | No       | 34  | 51.4                                   | 31.2–<br>71.6            |                     |    |                 |                   |
| Estrogen receptor status               | Positive | 75  | 44.2                                   | 21.6–<br>66.7            | 0.391               | –  |                 |                   |
|                                        | Negative | 57  | 46.5                                   | 38.6–<br>54.3            |                     |    |                 |                   |
| Progesterone receptor status           | Positive | 69  | 49.0                                   | 35.5–<br>62.5            | 0.690               | –  |                 |                   |
|                                        | Negative | 63  | 44.6                                   | 33.5–<br>55.7            |                     |    |                 |                   |
| HER-2/ neu                             | Positive | 38  | 46.5                                   | 38.2–<br>54.7            | 0.987               | –  |                 |                   |
|                                        | Negative | 48  | 51.4                                   | 28.1–<br>74.8            |                     |    |                 |                   |
| SBR grade                              | 1        | 15  | 68.2                                   | 54.3–<br>82.0            | 0.367               | –  |                 |                   |
|                                        | 2        | 46  | 49.7                                   | 40.3–<br>59.0            |                     |    |                 |                   |
|                                        | 3        | 48  | 36.1                                   | 29.8–<br>42.5            |                     |    |                 |                   |
| Axillary level II dissection           | Yes      | 118 | 44.6                                   | 38.2–<br>51.0            | 0.977               | –  |                 |                   |
|                                        | No       | 21  | 32.0                                   | 20.4–<br>43.5            |                     |    |                 |                   |
| <i>Adjuvant therapy before relapse</i> |          |     |                                        |                          |                     |    |                 |                   |
| Chemotherapy                           | Yes      | 124 | 44.6                                   | 37.5–<br>51.7            | 0.717               | –  |                 |                   |
|                                        | No       | 15  | 20.2                                   | 7.6–<br>32.8             |                     |    |                 |                   |
| Hormonal therapy                       | Yes      | 73  | 49.0                                   | 29.4–<br>68.6            | 0.255               | –  |                 |                   |
|                                        | No       | 66  | 43.9                                   | 34.2–                    |                     |    |                 |                   |

|                                                                   |      |     |      |                       |         |      |           |           |      |
|-------------------------------------------------------------------|------|-----|------|-----------------------|---------|------|-----------|-----------|------|
| Radiotherapy                                                      | Yes  | 32  | 44.2 | 53.5<br>13.5–<br>74.8 | 0.588   | –    |           |           |      |
|                                                                   | No   | 107 | 44.6 | 33.7–<br>55.5         |         |      |           |           |      |
| Clinical features after relapse                                   |      |     |      |                       |         |      |           |           |      |
| Age at relapse                                                    | ≤50  | 70  | 41.6 | 29.1–<br>54.0         | 0.670   | –    |           |           |      |
|                                                                   | >50  | 69  | 46.9 | 35.8–<br>58.1         |         |      |           |           |      |
| Clinical neck node size (cm)                                      | ≤1.3 | 47  | 43.3 | 31.8–<br>54.7         | 0.240   | –    |           |           |      |
|                                                                   | >1.3 | 46  | 42.4 | 32.7–<br>52.1         |         |      |           |           |      |
| Selective neck dissection                                         | Yes  | 61  | 51.7 | 44.7–<br>58.7         | 0.001   | 1    |           |           |      |
|                                                                   | No   | 78  | 33.0 | 24.3–<br>41.7         |         |      | 1.77      | 1.22–2.56 | .003 |
| Time interval from primary tumor surgery to neck relapse (months) | ≤24  | 64  | 29.1 | 21.7–<br>36.5         | <0.0001 | 2.07 | 1.44–2.98 | <.0001    |      |
|                                                                   | >24  | 75  | 51.6 | 41.0–<br>62.3         |         |      |           |           | 1    |
| Chemotherapy                                                      | Yes  | 113 | 44.2 | 34.8–<br>53.6         | 0.568   | –    |           |           |      |
|                                                                   | No   | 26  | 44.2 | 0.1–<br>88.9          |         |      |           |           |      |
| Hormonal therapy **                                               | Yes  | 78  | 52.5 | 36.5–<br>68.5         | 0.053   | –    |           |           |      |
|                                                                   | No   | 12  | 27.7 | 0.1–<br>68.9          |         |      |           |           |      |
| Radiotherapy                                                      | Yes  | 57  | 47.4 | 40.5–<br>54.2         | 0.496   | –    |           |           |      |
|                                                                   | No   | 82  | 41.0 | 30.1–<br>52.0         |         |      |           |           |      |

# 95% CI: 95% confidence interval; Δlog rank test; \*HR: hazard ratio

\*\* Select primary tumor or neck tumor with ER and/or PR (+) cases
