# Supplementary material for: Long-Term Outcomes of Breast Cancer Patients Who Underwent Selective Neck Dissection for Metachronous Isolated Supraclavicular Nodal Metastasis
Source: MDPI journal article supplement (doi:10.3390/cancers14010164), 2021-12-29
Supplement: s1 [file s1]

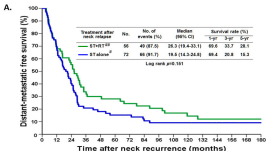

Number at risk

|          | 0  | 12 | 24 | 36 | 48 | 60 | 72 | 84 | 96 | 108 | 120 | 132 | 144 | 156 | 168 | 180 |
|----------|----|----|----|----|----|----|----|----|----|-----|-----|-----|-----|-----|-----|-----|
| ST+RT    | 56 | 39 | 31 | 18 | 16 | 15 | 13 | 12 | 11 | 8   | 6   | 5   | 5   | 5   | 5   | 5   |
| ST alone | 72 | 58 | 29 | 15 | 13 | 11 | 10 | 7  | 6  | 6   | 6   | 5   | 5   | 3   | 1   | 1   |

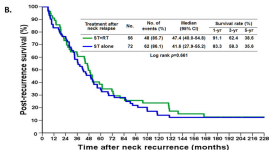

Number at risk

|          | 0  | 12 | 24 | 36 | 48 | 60 | 72 | 84 | 96 | 108 | 120 | 132 | 144 | 156 | 168 | 180 | 192 | 204 | 216 | 228 |
|----------|----|----|----|----|----|----|----|----|----|-----|-----|-----|-----|-----|-----|-----|-----|-----|-----|-----|
| ST+RT    | 56 | 51 | 41 | 34 | 27 | 23 | 18 | 15 | 14 | 12  | 11  | 8   | 7   | 7   | 5   | 5   | 4   | 3   | 1   | 1   |
| ST alone | 72 | 60 | 55 | 42 | 32 | 34 | 29 | 18 | 14 | 11  | 9   | 7   | 4   | 3   | 2   | 2   | 2   | 2   | 2   | 2   |

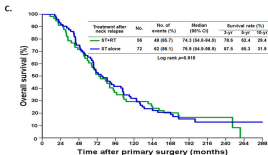

Number at risk

|          | 0  | 24 | 48 | 72 | 96 | 120 | 144 | 168 | 192 | 216 | 240 | 264 |
|----------|----|----|----|----|----|-----|-----|-----|-----|-----|-----|-----|
| ST+RT    | 56 | 51 | 40 | 28 | 20 | 16  | 14  | 11  | 8   | 7   | 3   | 0   |
| ST alone | 72 | 67 | 54 | 38 | 30 | 23  | 16  | 12  | 6   | 4   | 4   | 2   |

Figure S1 Kaplan-Meier curve of  
 A, distant-metastatic free survival B, post-recurrence survival  
 C, overall survival for mSLNM patients by radiotherapy

#ST: systemic therapy; #RT: radiotherapy
