# Supplementary material for: Long-Term Outcomes of Breast Cancer Patients Who Underwent Selective Neck Dissection for Metachronous Isolated Supraclavicular Nodal Metastasis
Source: MDPI journal article supplement (doi:10.3390/cancers14010164), 2021-12-29
Supplement: s1 [file s1]

Table S2. Univariate and Multivariate Analysis of Overall Survival for miSLNM Patients

| Variables                       |          | No. | Median<br>Survival<br>Time<br>(Months) | 95% CI *<br>of Median | <i>p</i> Δ<br>Value | HR   | 95% CI<br>of HR | <i>p</i><br>Value |
|---------------------------------|----------|-----|----------------------------------------|-----------------------|---------------------|------|-----------------|-------------------|
| Initial clinical features       |          |     |                                        |                       |                     |      |                 |                   |
| Age (years)                     | ≤40      | 42  | 68.0                                   | 52.7–83.4             | 0.927               | –    |                 |                   |
|                                 | >40      | 97  | 82.6                                   | 64.3–101.0            |                     |      |                 |                   |
| Tumor size (cm)                 | ≤3       | 92  | 76.9                                   | 61.9–91.9             | 0.302               | –    |                 |                   |
|                                 | >3       | 47  | 66.3                                   | 54.7–77.9             |                     |      |                 |                   |
| Axillary involvement            | Yes      | 105 | 88.2                                   | 50.9–125.5            | 0.140               | –    |                 |                   |
|                                 | No       | 34  | 67.6                                   | 54.5–80.7             |                     |      |                 |                   |
| Estrogen receptor status        | Positive | 75  | 105.2                                  | 82.8–127.7            | 0.081               | –    |                 |                   |
|                                 | Negative | 57  | 70.2                                   | 60.4–79.9             |                     |      |                 |                   |
| Progesterone receptor status    | Positive | 69  | 88.8                                   | 47.1–130.4            | 0.408               | –    |                 |                   |
|                                 | Negative | 63  | 73.1                                   | 58.0–88.2             |                     |      |                 |                   |
| HER-2/ neu                      | Positive | 38  | 67.1                                   | 59.4–74.8             | 0.159               | –    |                 |                   |
|                                 | Negative | 48  | 105.2                                  | 89.9–120.5            |                     |      |                 |                   |
| SBR grade                       | 1        | 15  | 94.3                                   | 72.9–115.6            | 0.231               | –    |                 |                   |
|                                 | 2        | 46  | 70.2                                   | 50.8–89.5             |                     |      |                 |                   |
|                                 | 3        | 48  | 65.1                                   | 41.6–88.5             |                     |      |                 |                   |
| Axillary level II dissection    | Yes      | 118 | 74.3                                   | 60.6–87.7             | 0.991               | –    |                 |                   |
|                                 | No       | 21  | 64.4                                   | 13.9–115.0            |                     |      |                 |                   |
| Adjuvant therapy before relapse |          |     |                                        |                       |                     |      |                 |                   |
| Chemotherapy                    | Yes      | 124 | 76.3                                   | 61.7–91.0             | 0.674               | –    |                 |                   |
|                                 | No       | 15  | 67.6                                   | 38.0–97.2             |                     |      |                 |                   |
| Hormonal therapy                | Yes      | 73  | 88.8                                   | 44.9–132.7            | 0.127               | –    |                 |                   |
|                                 | No       | 66  | 70.2                                   | 59.2–81.2             |                     |      |                 |                   |
| Radiotherapy                    | Yes      | 32  | 67.6                                   | 60.5–74.7             | 0.166               | –    |                 |                   |
|                                 | No       | 107 | 76.9                                   | 55.3–98.5             |                     |      |                 |                   |
| Clinical features after relapse |          |     |                                        |                       |                     |      |                 |                   |
| Age at relapse                  | ≤50      | 70  | 68.0                                   | 57.9–78.1             | 0.387               | –    |                 |                   |
|                                 | >50      | 69  | 85.1                                   | 62.5–107.6            |                     |      |                 |                   |
| Clinical neck node size (cm)    | ≤1.3     | 47  | 66.3                                   | 55.6–77.0             | 0.196               | –    |                 |                   |
|                                 | >1.3     | 46  | 73.1                                   | 56.3–89.9             |                     |      |                 |                   |
| Selective neck dissection       | Yes      | 61  | 88.2                                   | 62.5–113.9            | 0.001               | 1    |                 |                   |
|                                 | No       | 78  | 67.2                                   | 56.7–77.7             |                     |      |                 |                   |
| Time interval from primary      | ≤24      | 64  | 43.5                                   | 35.0–51.9             | <0.0001             | 3.54 | 2.44–           | <0.0001           |

|                                        |     |     |       |            |       |   |      |
|----------------------------------------|-----|-----|-------|------------|-------|---|------|
| tumor surgery to neck relapse (months) | >24 | 75  | 106.7 | 97.6–116.0 |       | 1 | 5.16 |
| Chemotherapy                           | Yes | 113 | 73.1  | 59.7–86.5  | 0.442 | – |      |
|                                        | No  | 26  | 82.6  | 19.0–146.2 |       |   |      |
| Hormonal therapy **                    | Yes | 78  | 84.8  | 50.7–119.0 | 0.162 | – |      |
|                                        | No  | 12  | 62.4  | 0.1–145.8  |       |   |      |
| Radiotherapy                           | Yes | 57  | 74.3  | 54.2–94.4  | 0.945 | – |      |
|                                        | No  | 82  | 73.1  | 57.2–89.0  |       |   |      |

# 95% CI: 95% confidence interval; Δlog rank test; \*HR: hazard ratio

\*\* Select primary tumor or neck tumor with ER and/or PR (+) cases
