# Supplementary material for: Long-Term Outcomes of Breast Cancer Patients Who Underwent Selective Neck Dissection for Metachronous Isolated Supraclavicular Nodal Metastasis
Source: MDPI journal article supplement (doi:10.3390/cancers14010164), 2021-12-29
Supplement: s1 [file s1]

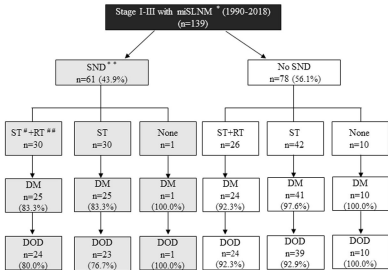

\*miSLNM: metachronous isolated supraclavicular lymph node metastasis; \*\*SND: selective neck dissection; #ST: systemic therapy; ##RT: radio therapy; DM: distant metastasis; DOD: Died of disease

**Figure S3 Overview of treatment patterns and outcomes based on selective neck dissection or not**
