# Supplementary material for: Long-Term Outcomes of Breast Cancer Patients Who Underwent Selective Neck Dissection for Metachronous Isolated Supraclavicular Nodal Metastasis
Source: MDPI journal article supplement (doi:10.3390/cancers14010164), 2021-12-29
Supplement: s1 [file s1]

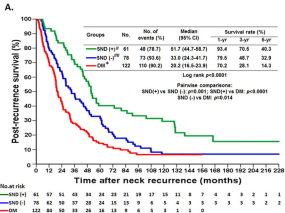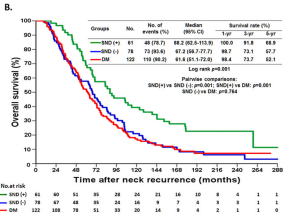

Figure S2 Kaplan-Meier curve of A, post-recurrence survival B, overall survival for miSLNM and miSLNM with distant metastasis

a SMD (+): miSLNM with neck dissection  
 b SMD (-): miSLNM without neck dissection  
 c DM: miSLNM with distant metastasis
